# Supplementary material for: Comprehensive Sequence Analysis of the Human IL23A Gene Defines New Variation Content and High Rate of Evolutionary Conservation
Source: PubMed Central journal article supplement — DNA Res. 2010 Feb 12;17(2):117–22. doi: 10.1093/dnares/dsq003 (PMC2853383; doi:10.1093/dnares/dsq003), 2010-02-12
Supplement: dsq003_1.pdf [file dsq003_1.pdf]

SUPPELEMENTARY FIGURE

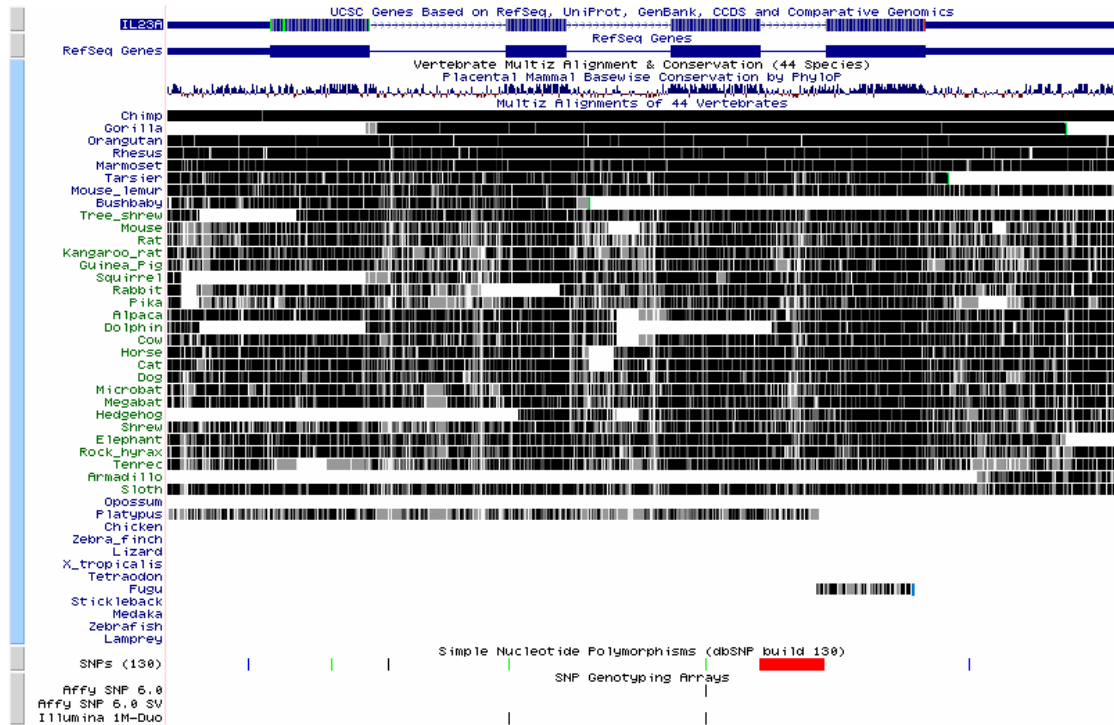

**Figure S1.** Intra-species sequence comparison of *IL23A*. Within the transcribed region of *IL23A*, the exonic regions are most highly conserved across the species. Eleven of the 44 vertebrates did not reveal a homologue for this gene. The UCSC Genome Browser (<http://genome.ucsc.edu>) was used to determine the sequence similarity of *IL23A* coding regions across 44 vertebrates, including 31 placental mammals, eight of which were primates.
